# Supplementary material for: Identification of the pre‐Bötzinger complex inspiratory center in calibrated “sandwich” slices from newborn mice with fluorescent Dbx1 interneurons
Source: PubMed Central journal article supplement (PMC4246597; doi:10.14814/phy2.12111), 2014-08-19

# Atlas of tdTomato Fluorescence in *Dbx1* mouse (P4) medulla oblongata

Ruangkittisakul A<sup>1</sup>, Kottick A<sup>2</sup>, Picardo MCD<sup>2</sup>,  
Ballanyi K<sup>1\*</sup>, Del Negro CA<sup>2\*</sup>

<sup>1</sup> Department of Physiology, University of Alberta,  
Edmonton, AB, Canada

<sup>2</sup> Department of Applied Science, The College of William & Mary,  
Williamsburg, VA, USA

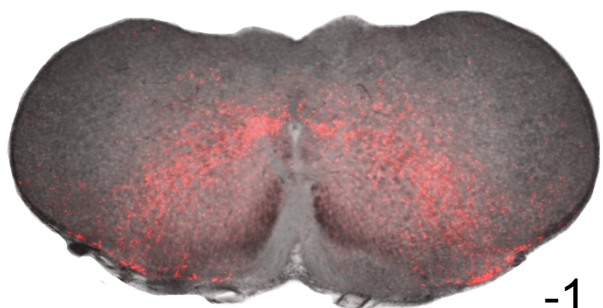

-1.15  
mm

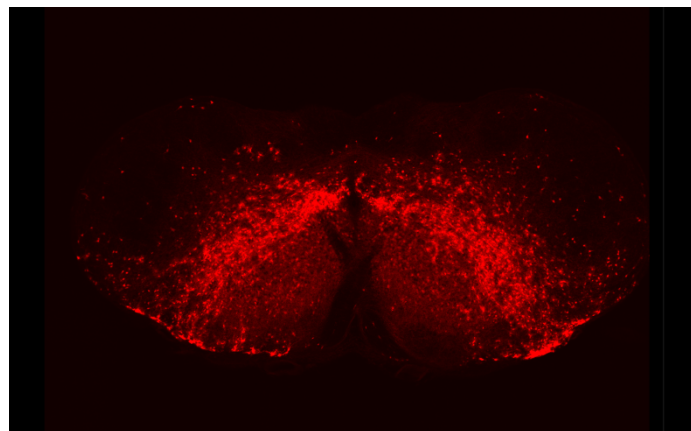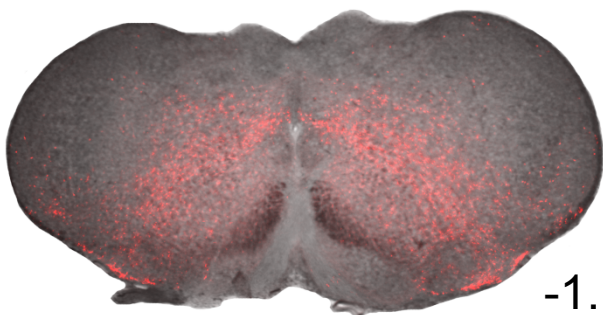

-1.10  
mm

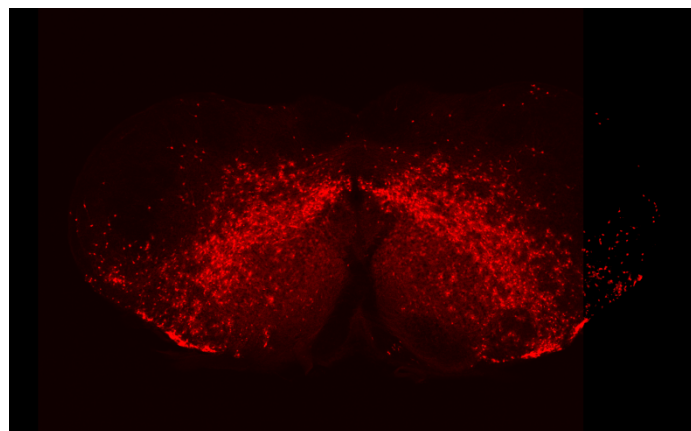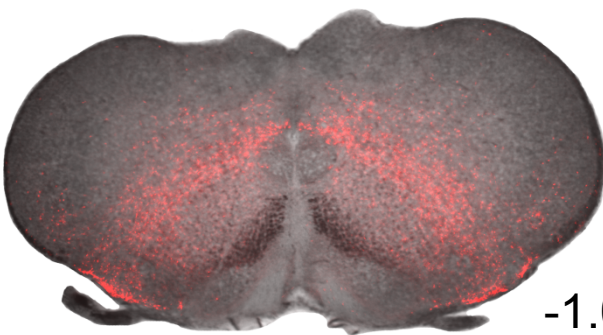

-1.05  
mm

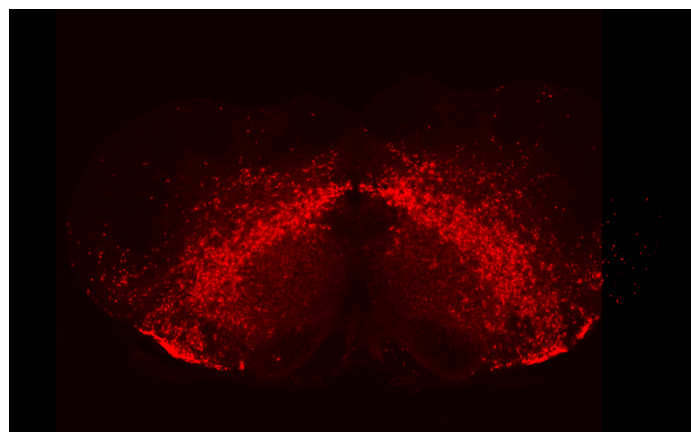

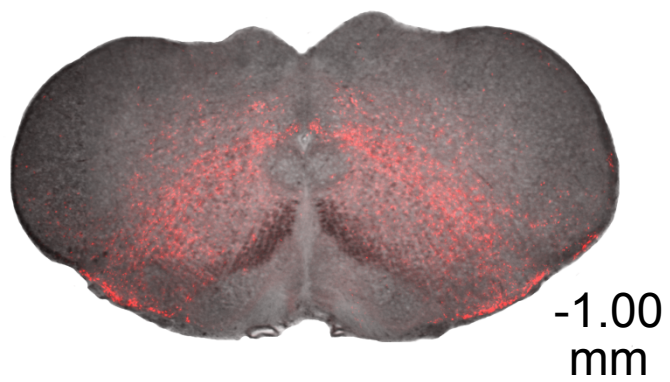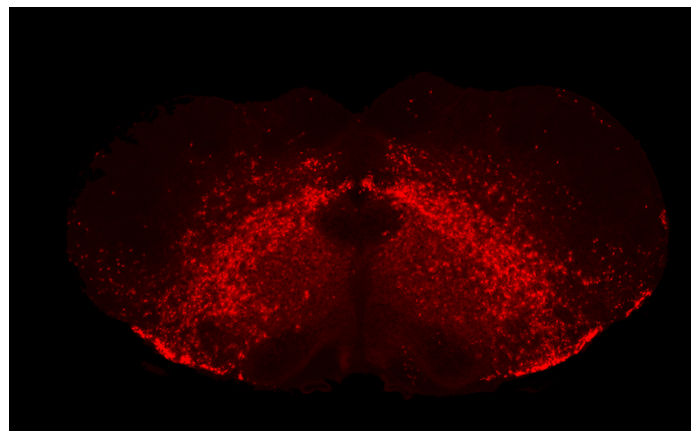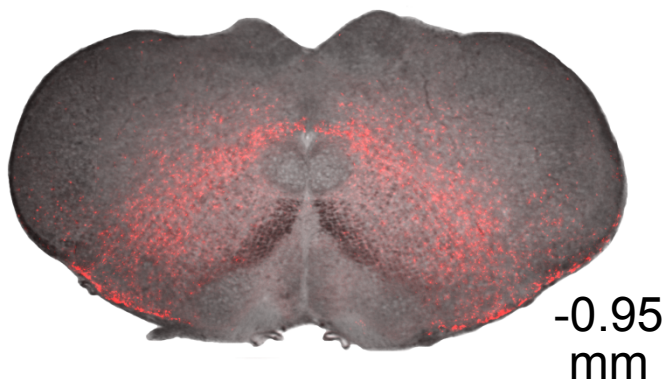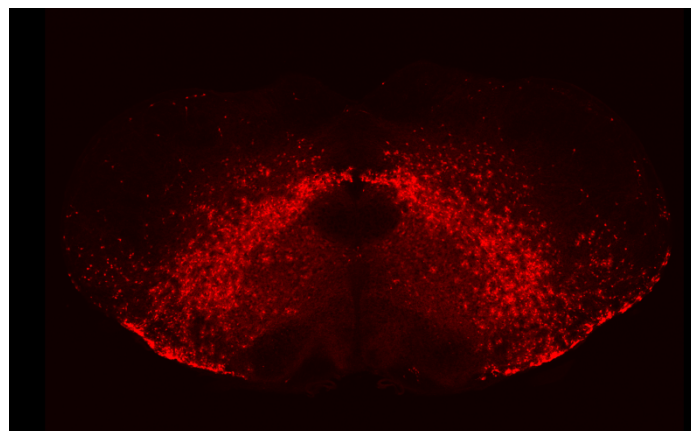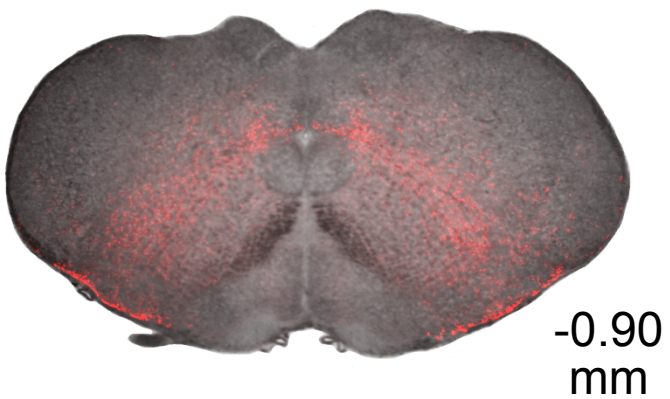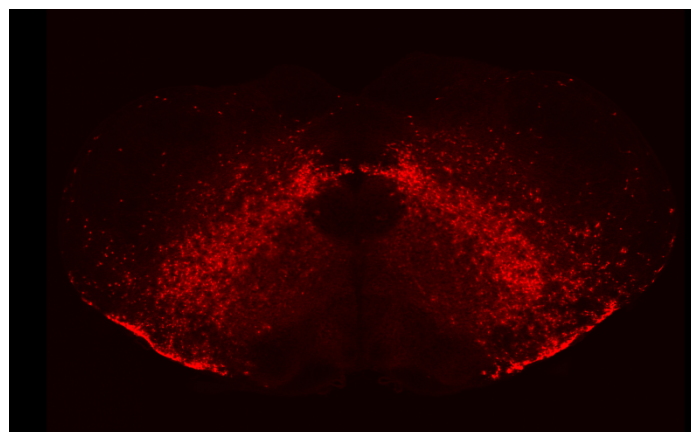

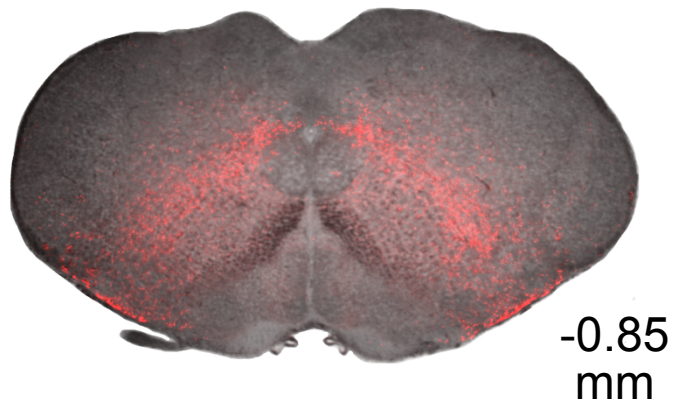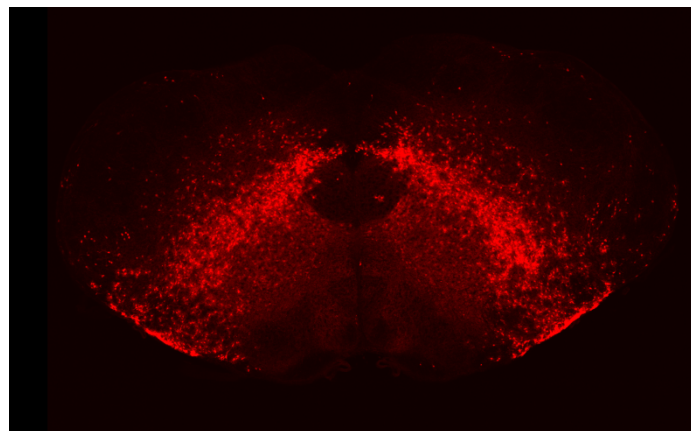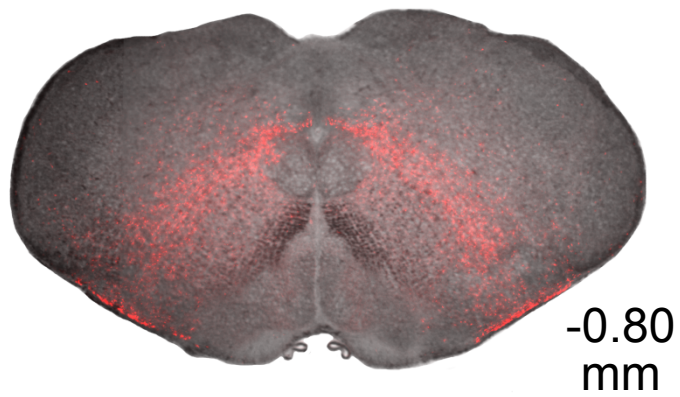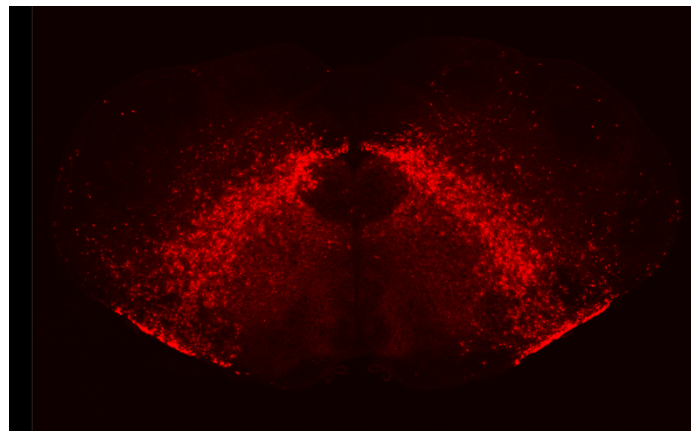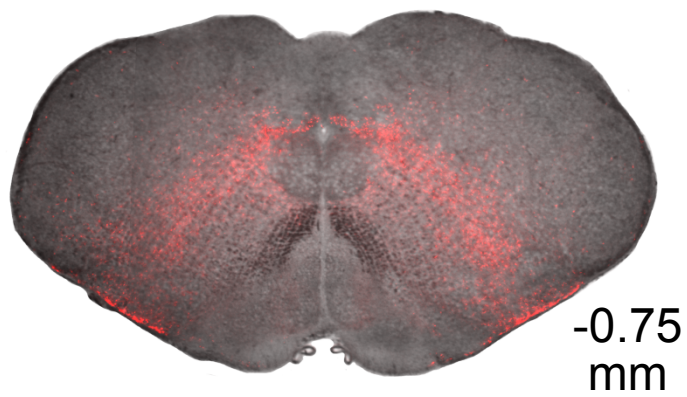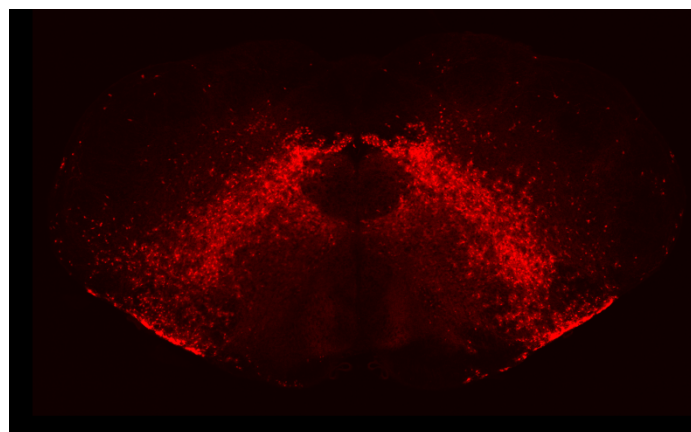

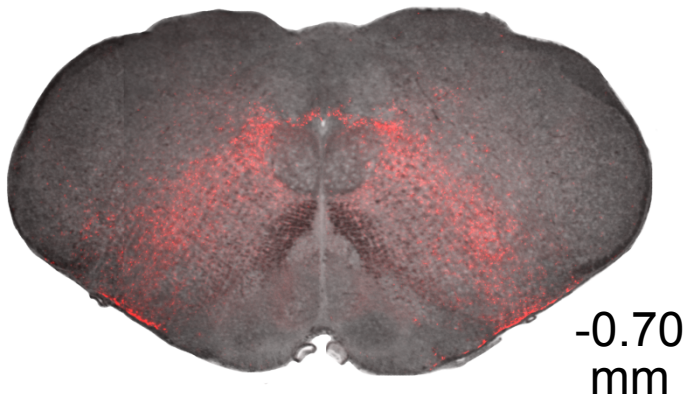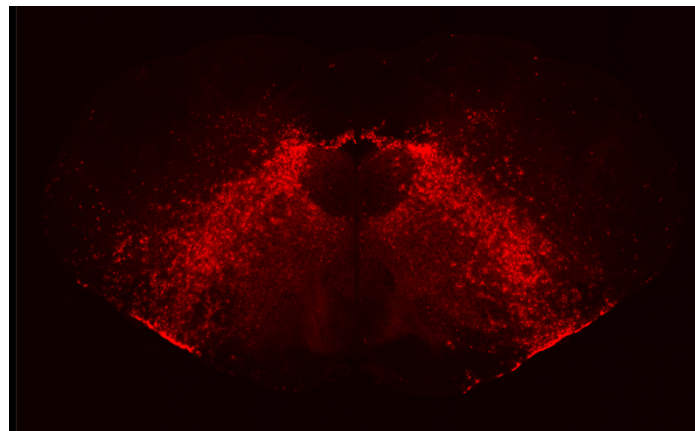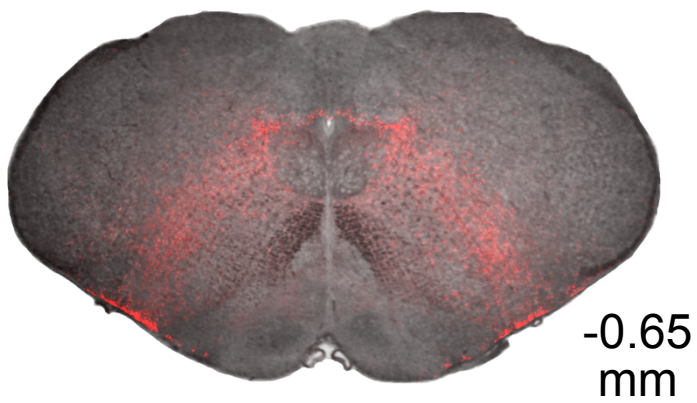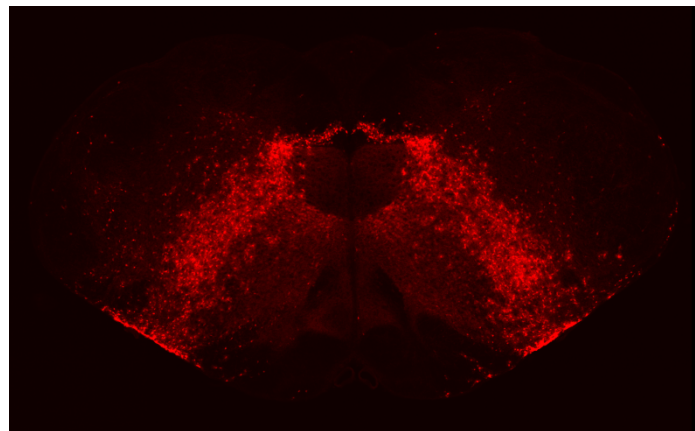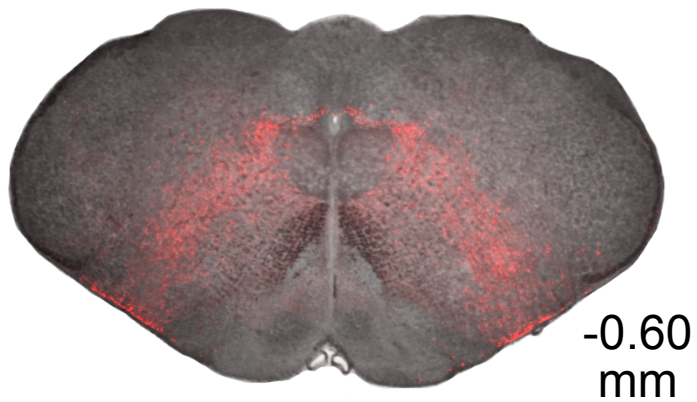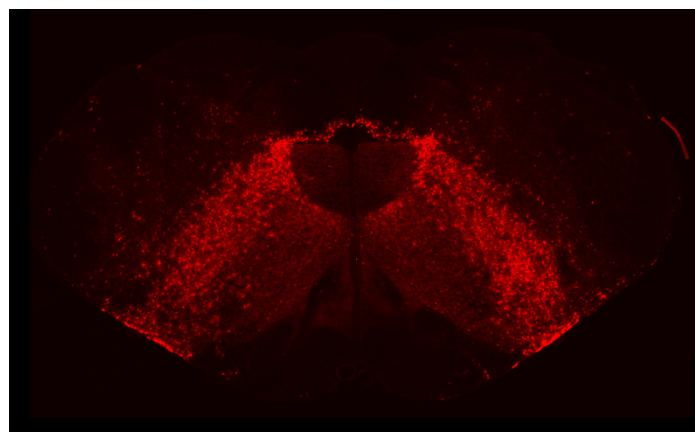

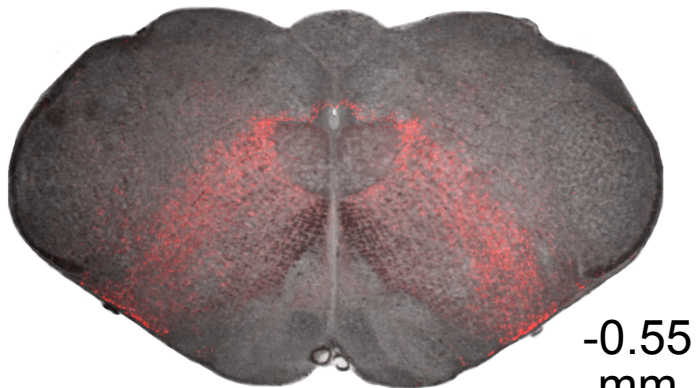

-0.55  
mm

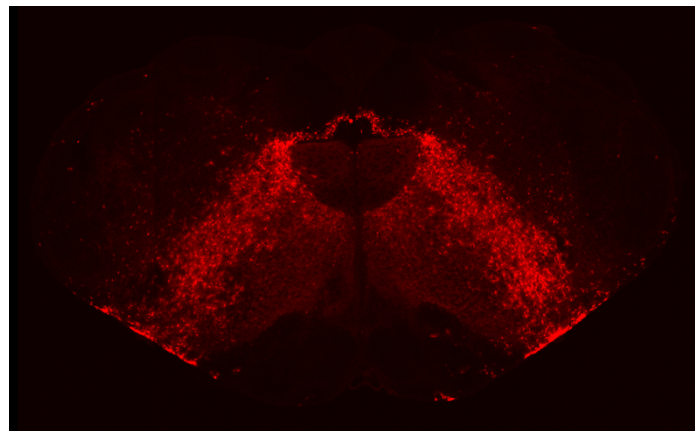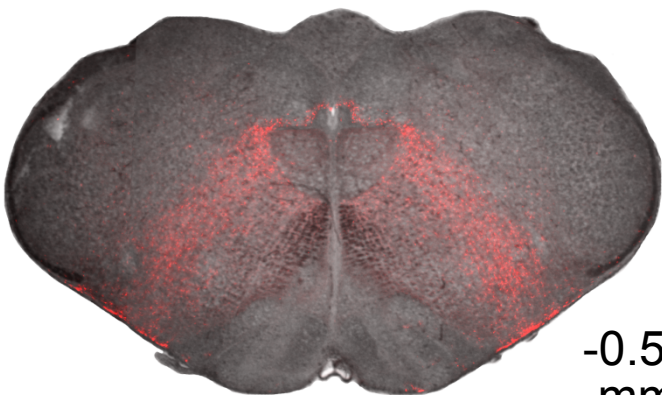

-0.50  
mm

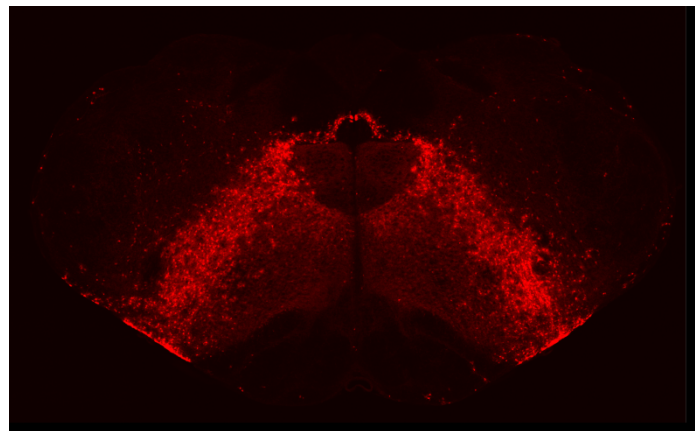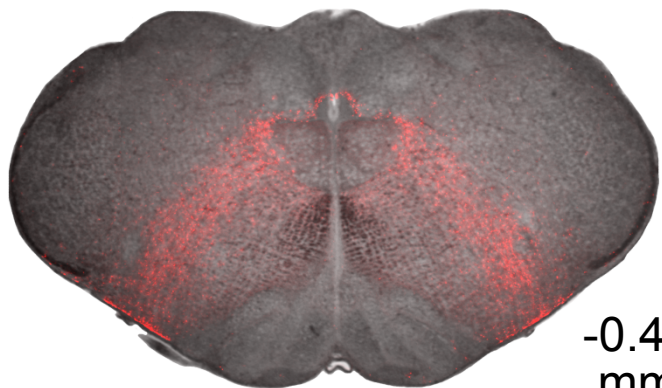

-0.45  
mm

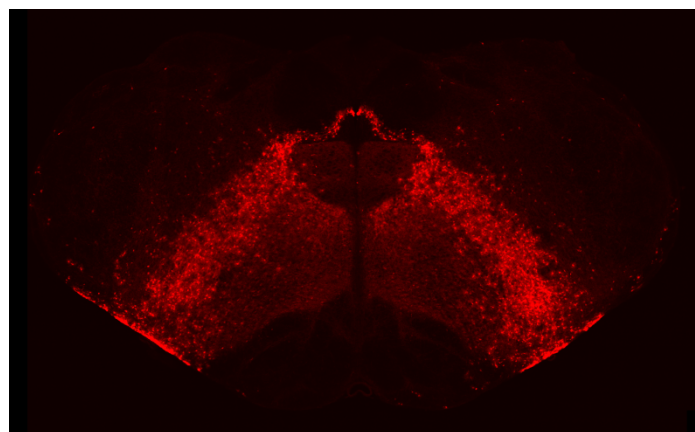

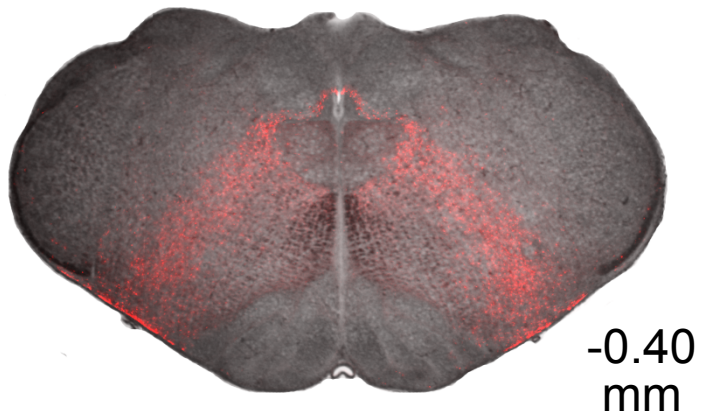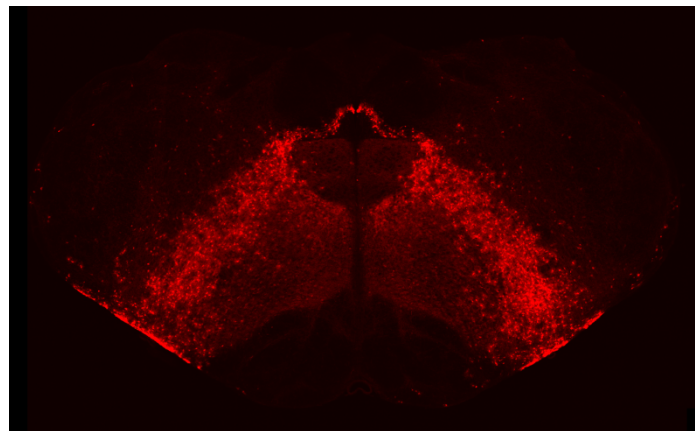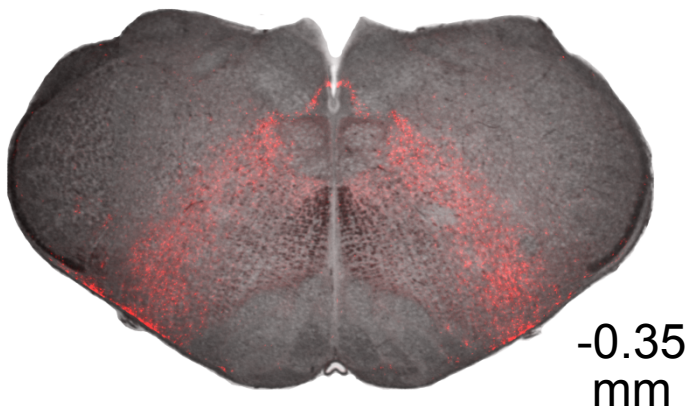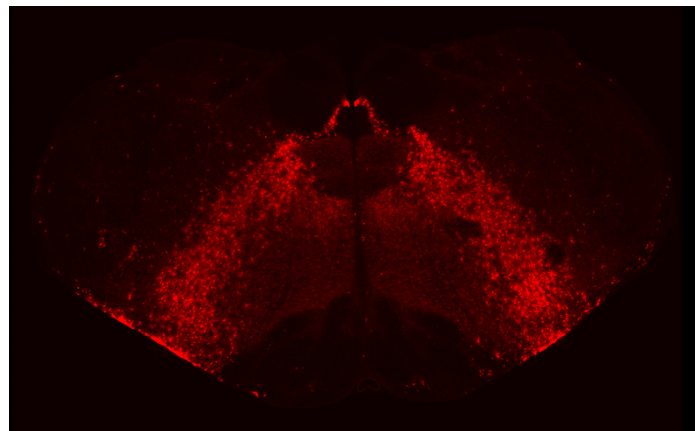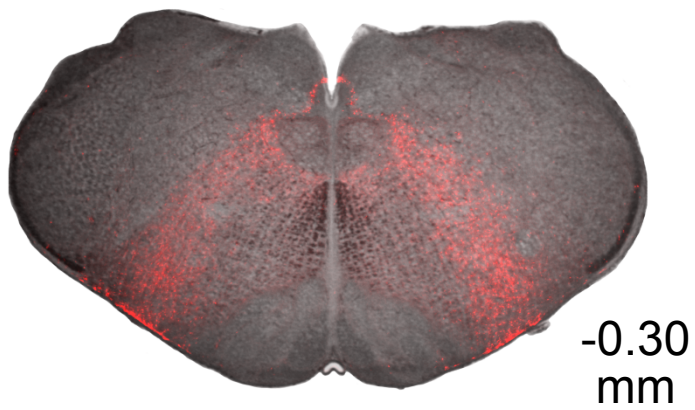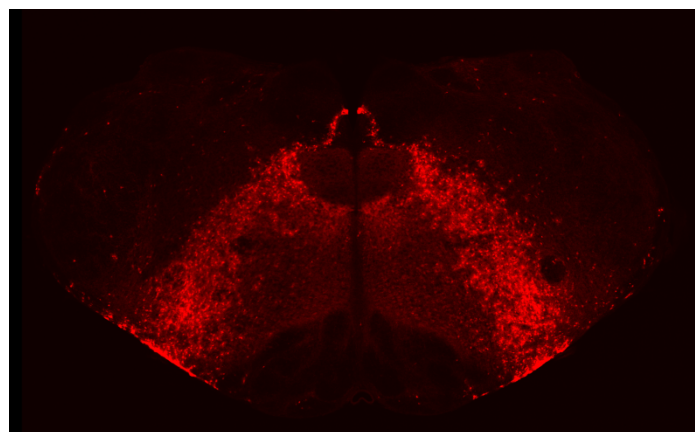

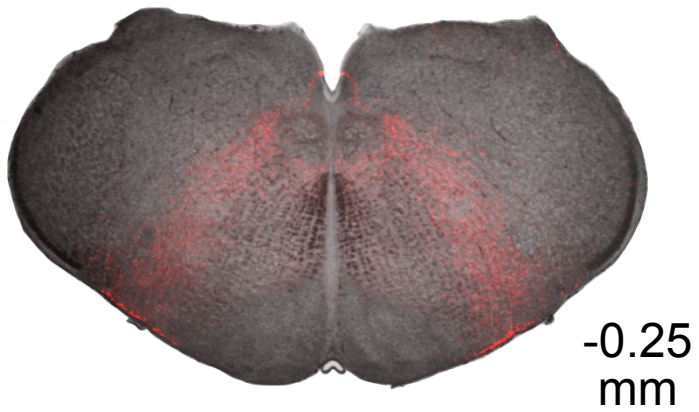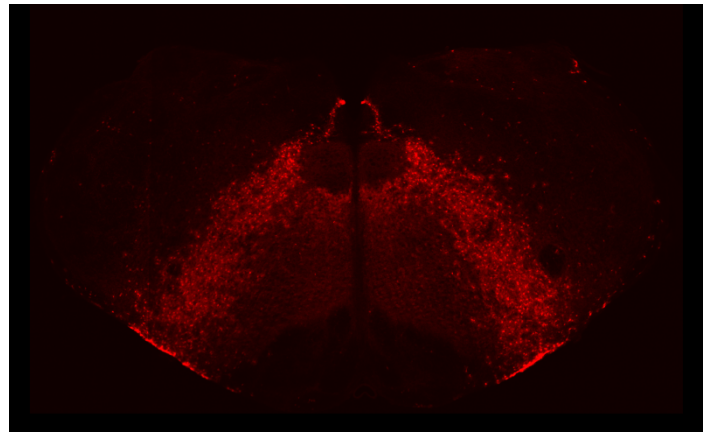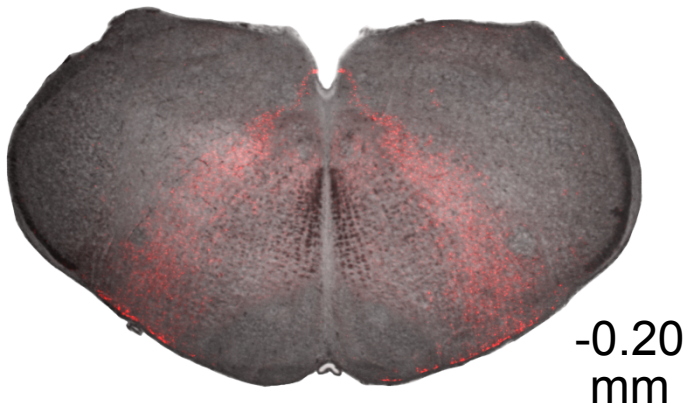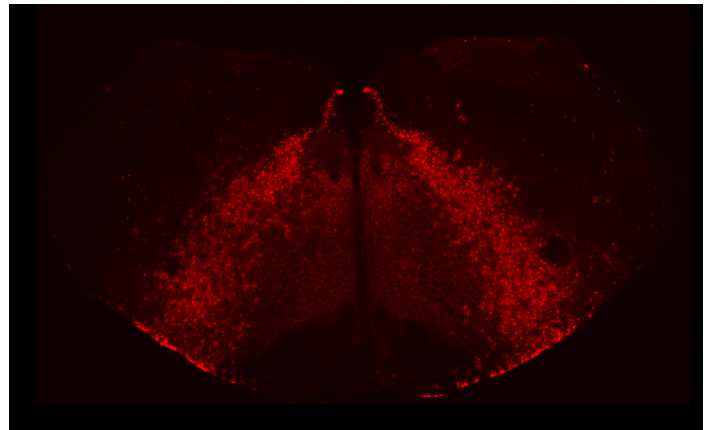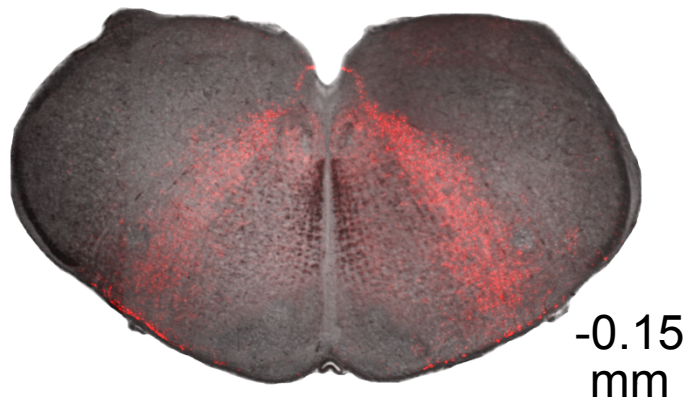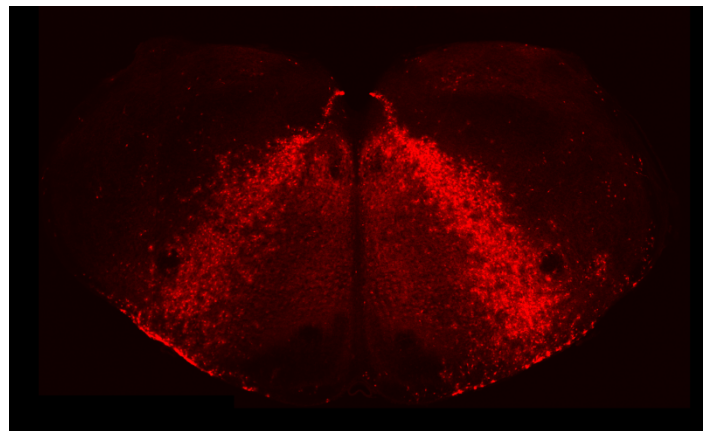



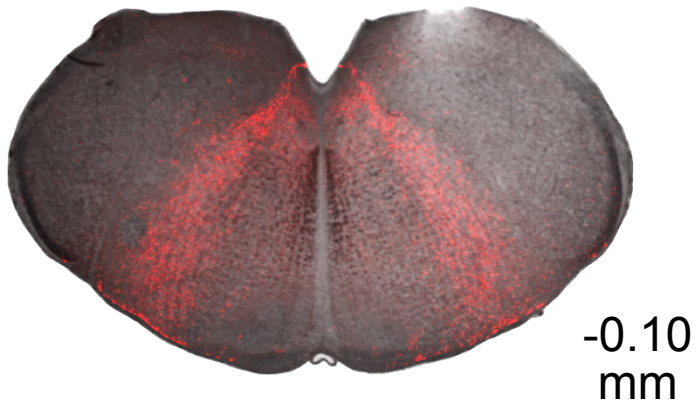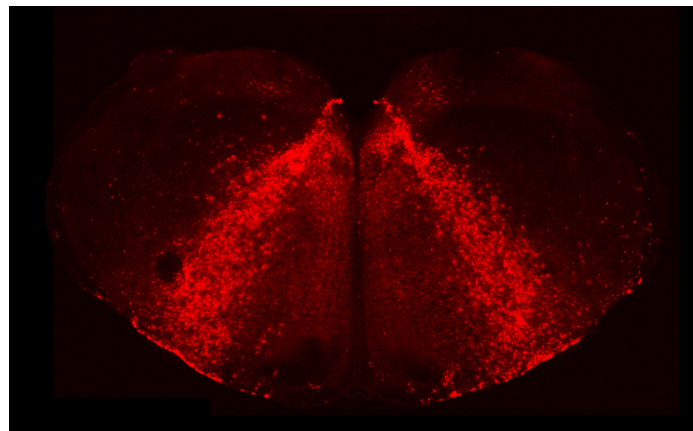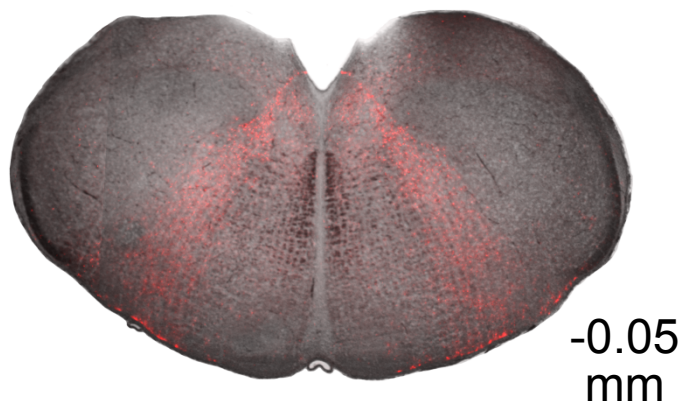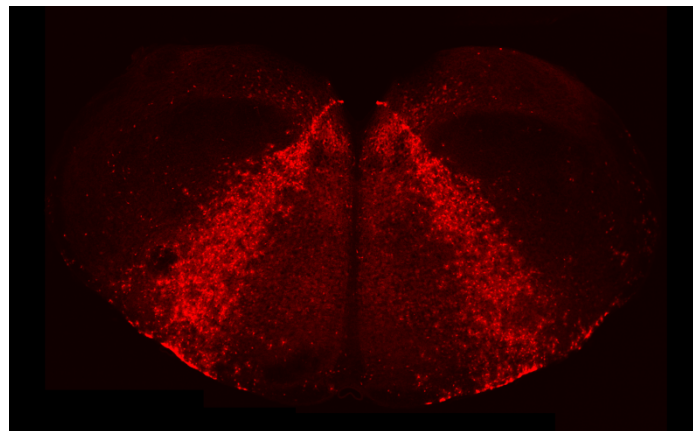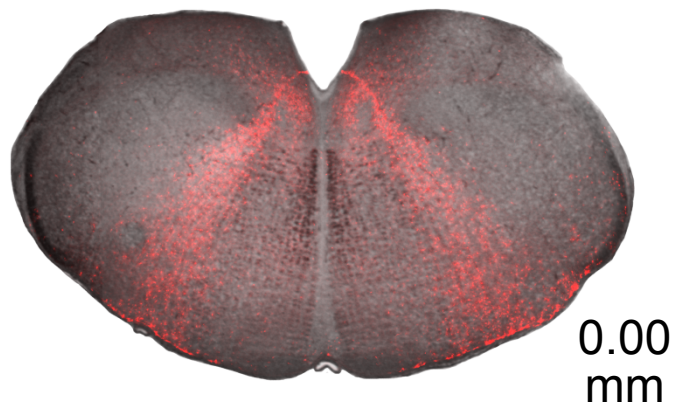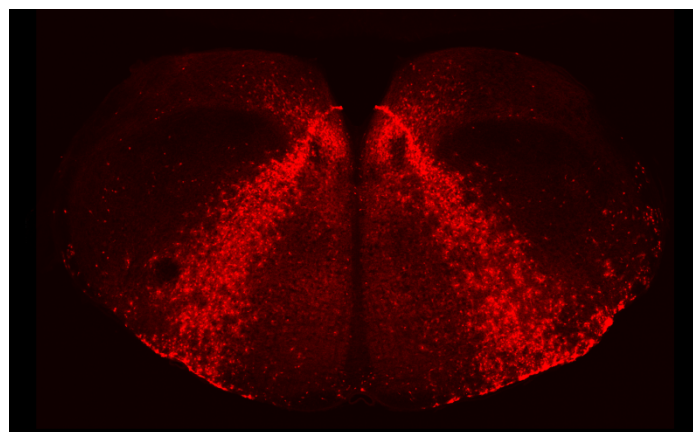

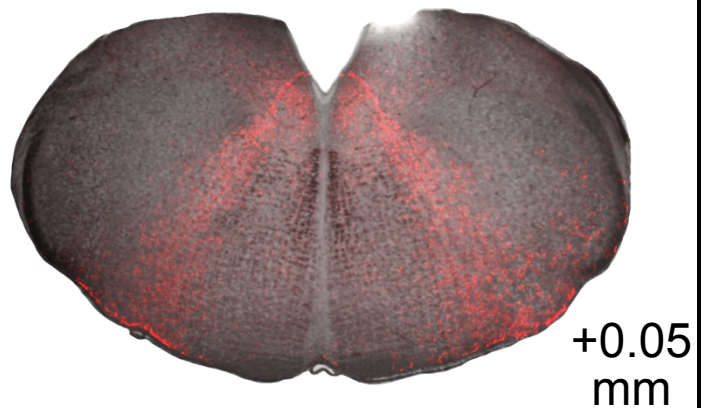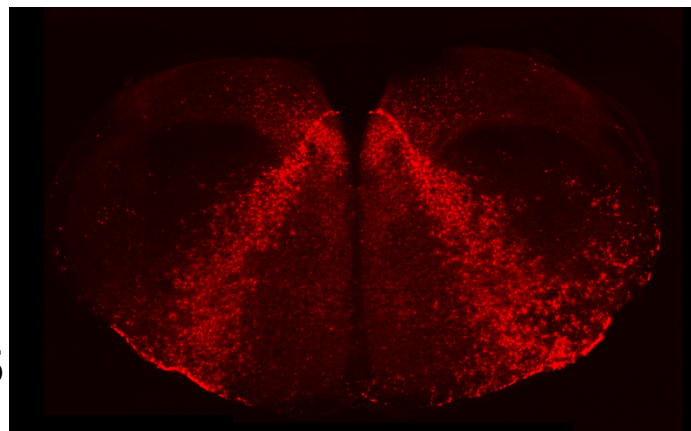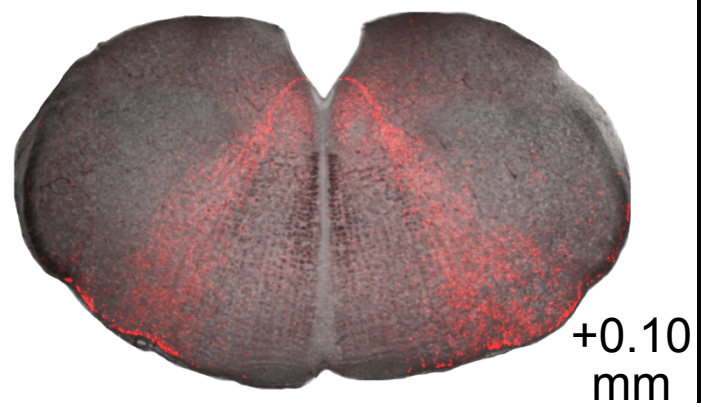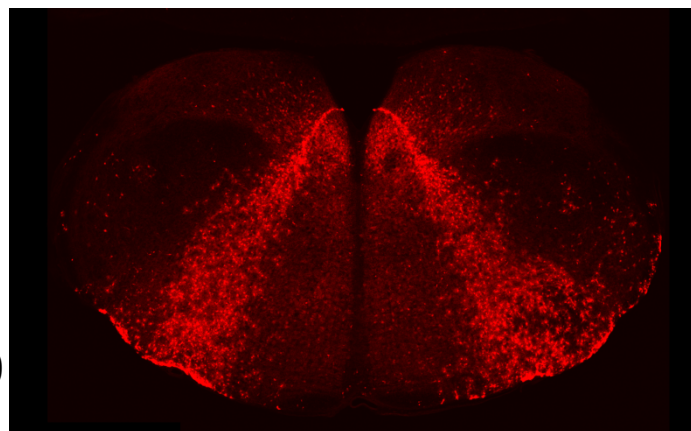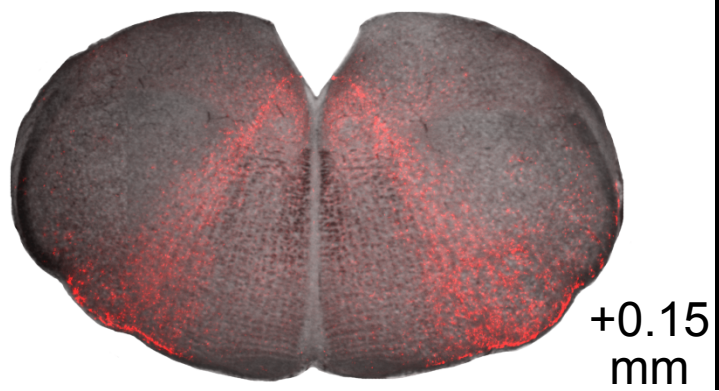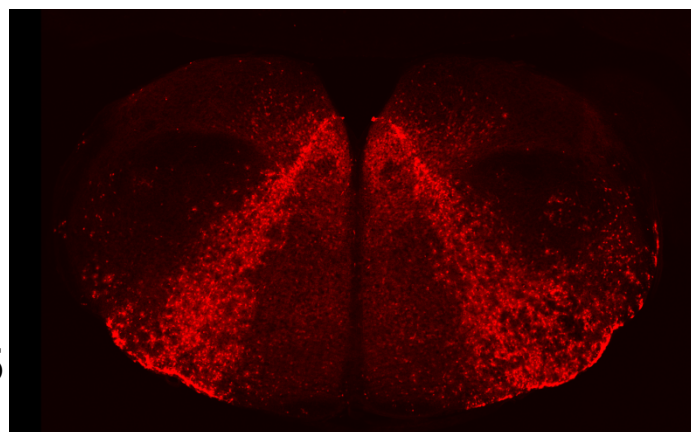

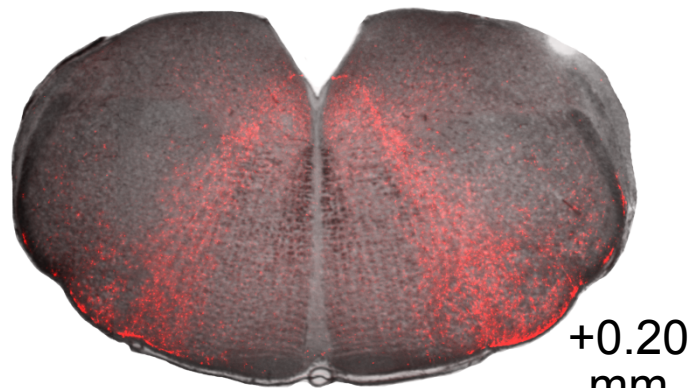

+0.20  
mm

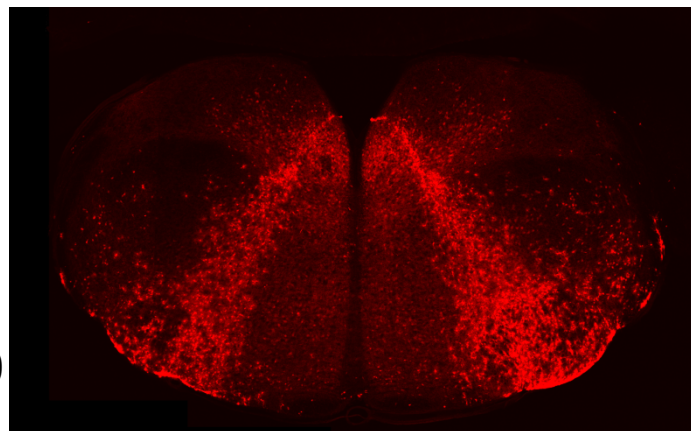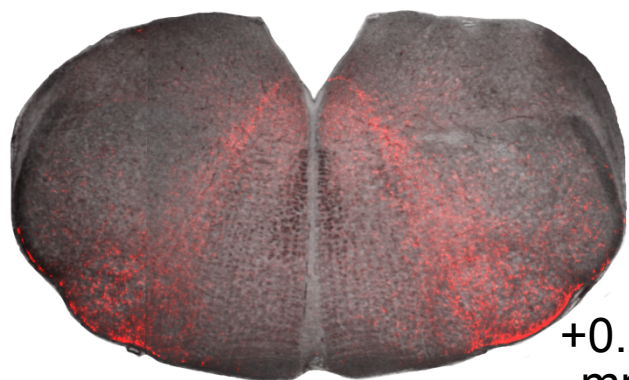

+0.25  
mm

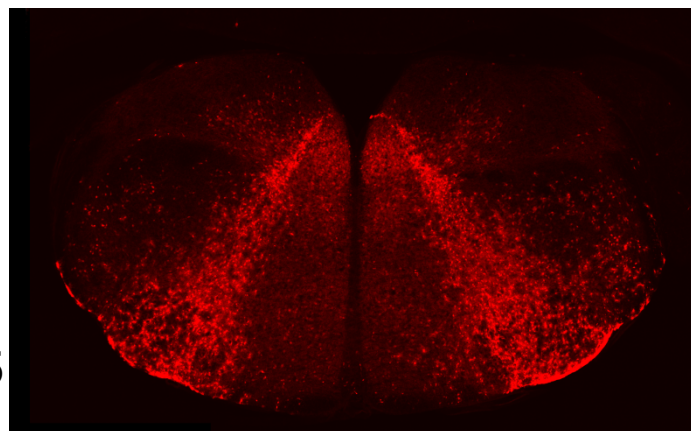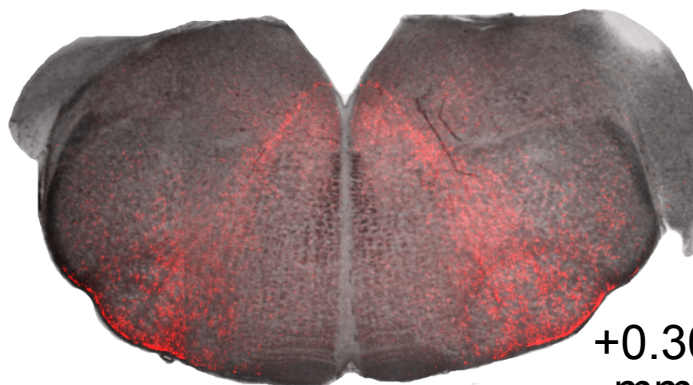

+0.30  
mm

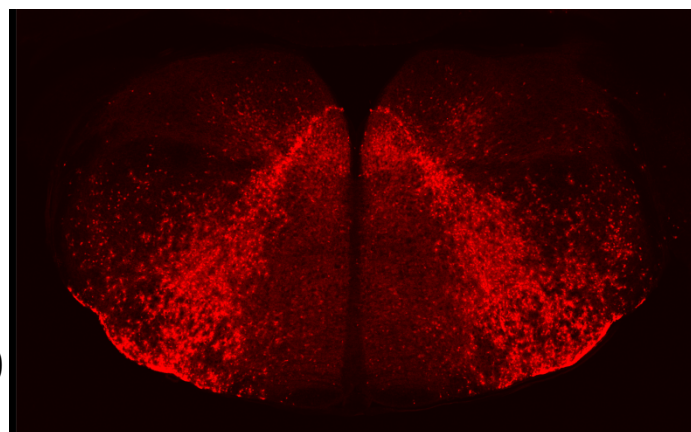

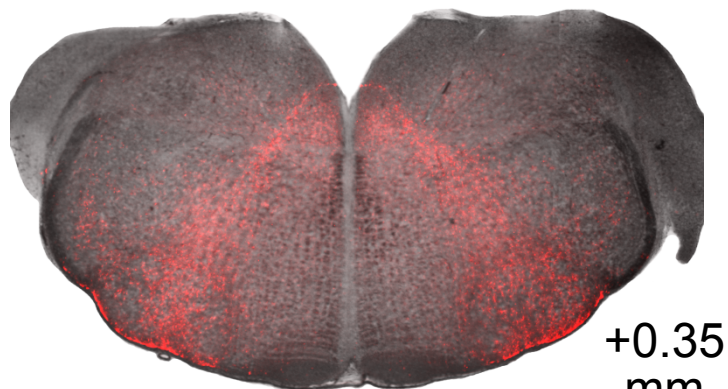

+0.35  
mm

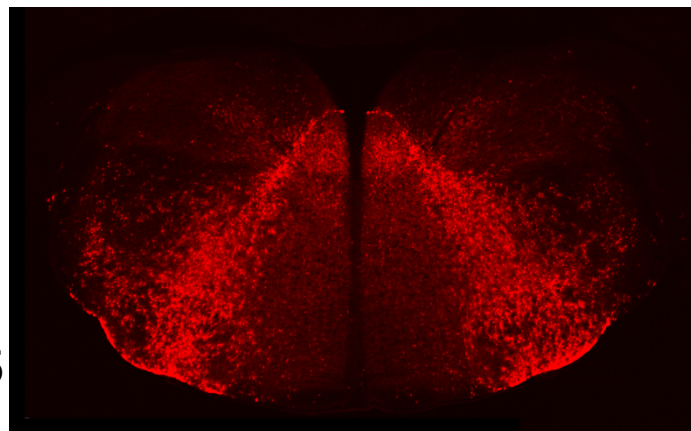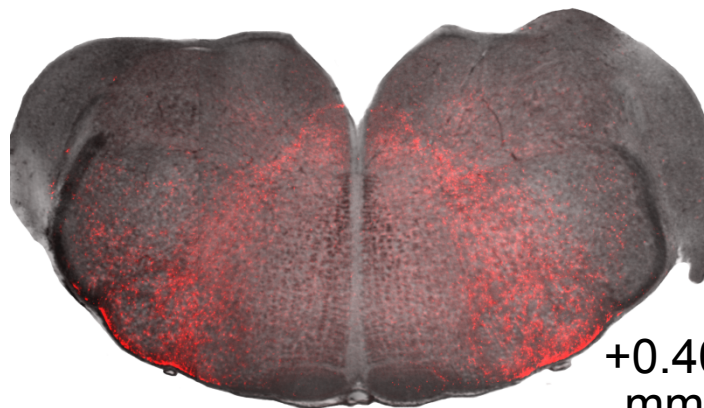

+0.40  
mm

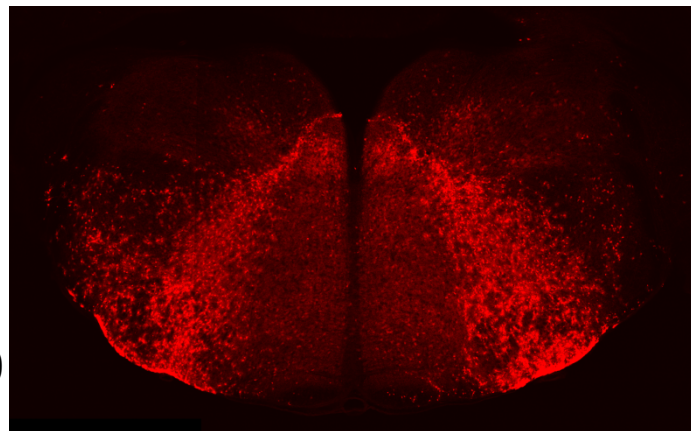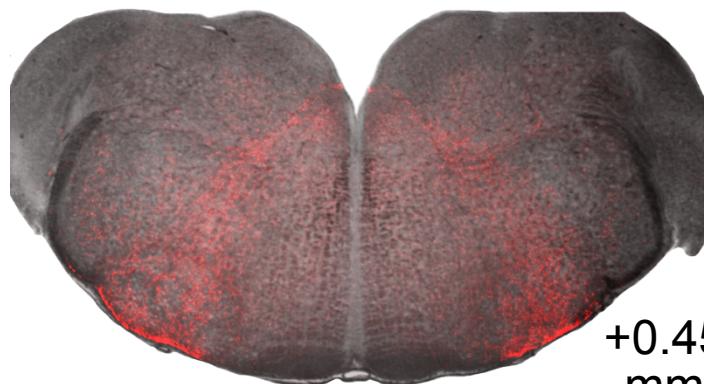

+0.45  
mm

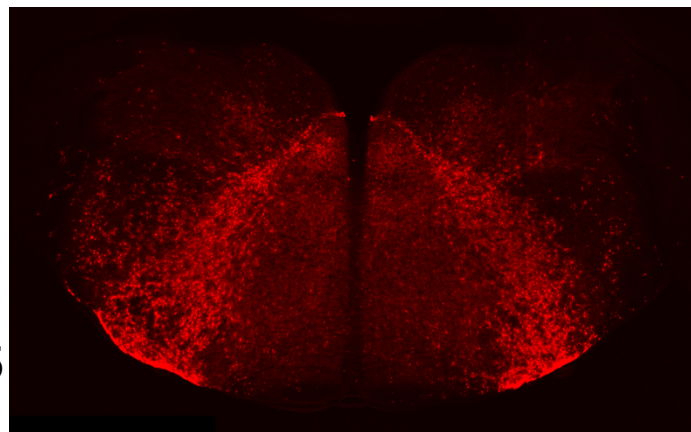

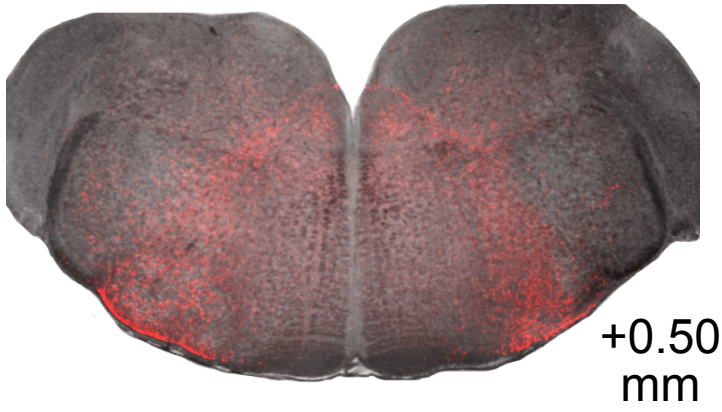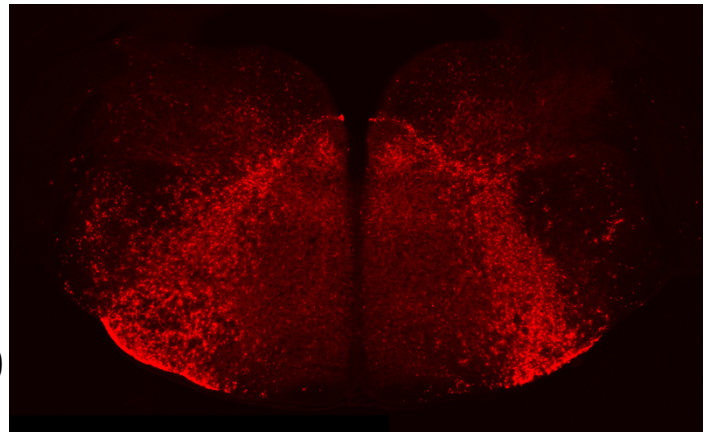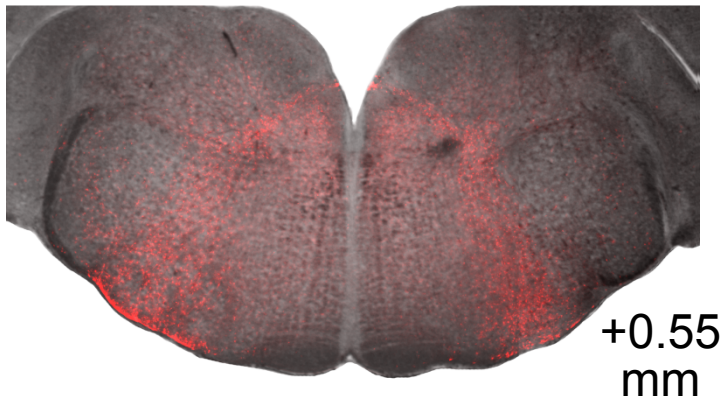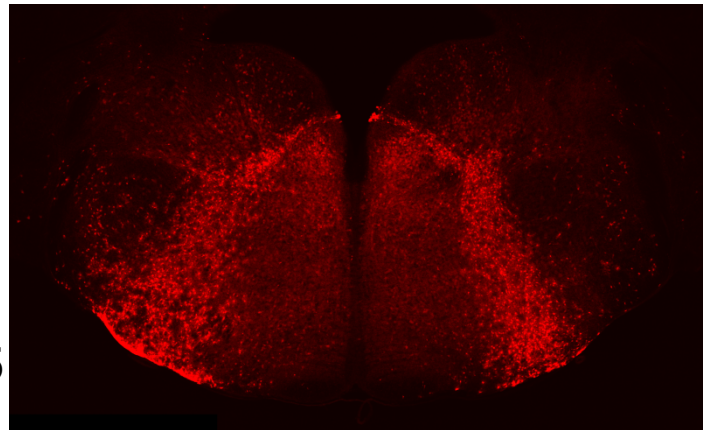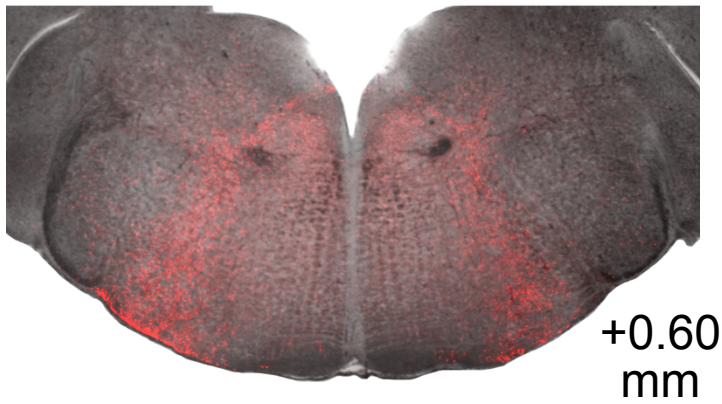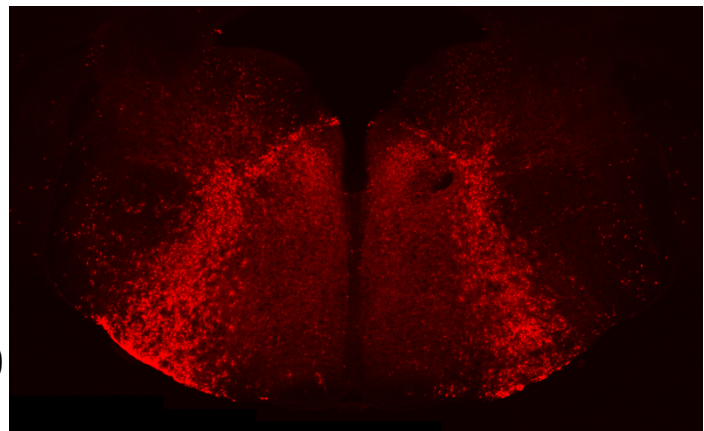

Supplement: phy2-2-e12111-s3.pdf [file phy2-2-e12111-s3.pdf]
